# Supplementary material for: Modulation of retinoid-X-receptors differentially regulates expression of apolipoprotein genes apoc1 and apoeb by zebrafish microglia
Source: Oxford University Press journal article supplement (doi:10.1242/bio.058990), 2021-12-08
Supplement: bio058990supp.pdf [file bio058990supp.pdf]

| Tool                  | Simple Score | Weighted Score | Original Tool Information |         |                               |            |
|-----------------------|--------------|----------------|---------------------------|---------|-------------------------------|------------|
|                       |              |                | BLAST Result              | Score   | Score Type                    | Cluster ID |
| <b>Compara</b>        | 1            | 0.930          |                           |         |                               | C1151282   |
| <b>eggNOG</b>         | 1            | 0.900          |                           |         |                               | E1_2E8B8   |
| <b>Hieranoid</b>      | 1            | 1.000          |                           |         |                               |            |
| <b>Homologene</b>     | 0            | 0.000          | Not matched by this tool. |         |                               |            |
| <b>Inparanoid</b>     | 1            | 1.050          | 53                        | 1.000   | Inparanoid score              | I12312     |
| <b>OMA</b>            | 0            | 0.000          | Not matched by this tool. |         |                               |            |
| <b>OrthoDB</b>        | 0            | 0.000          | Not matched by this tool. |         |                               |            |
| <b>OrthoFinder</b>    | 1            | 1.000          |                           |         |                               | FOG0006587 |
| <b>OrthoInspector</b> | 1            | 1.000          |                           |         |                               | T1603566   |
| <b>orthoMCL</b>       | 0            | 0.000          | Not matched by this tool. |         |                               |            |
| <b>Panther</b>        | 1            | 1.100          |                           |         | LDO                           | PTHR16565  |
| <b>Phylome</b>        | 0            | 0.000          | Not matched by this tool. |         |                               |            |
| <b>RoundUp</b>        | 1            | 1.030          |                           | avgDist | Average_Evolutionary_Distance | R8175      |
| <b>TreeFam</b>        | 1            | 0.960          |                           |         |                               |            |
| <b>ZFIN</b>           | 1            | 1.500          |                           |         |                               |            |
|                       | <b>10</b>    | <b>10.470</b>  |                           |         |                               |            |

| Input Order | Search Term | Zebrafish GeneID | ZFINID               | Zebrafish Symbol | Species 2 | Human GeneID | Human Species Gene ID | Human Symbol | DIOPT Score | Weighted Score | Rank | Best Score | Best Score Reverse | Prediction Derived From                                                                              | Alignment & Scores                  | Feedback                           | Gene2Function Details |
|-------------|-------------|------------------|----------------------|------------------|-----------|--------------|-----------------------|--------------|-------------|----------------|------|------------|--------------------|------------------------------------------------------------------------------------------------------|-------------------------------------|------------------------------------|-----------------------|
| 1           | apoc1       | 570638           | ZDB-GENE-030131-1074 | apoc1            | Human     | 341          | 607                   | APOC1        | 10          | 10.47          | high | Yes        | Yes                | Compara, eggNOG, Hieranoid, Inparanoid, OrthoFinder, OrthoInspector, Panther, RoundUp, TreeFam, ZFIN | <input type="button" value="View"/> | <input type="button" value="Add"/> | APOC1_details         |

**Fig. S1. Output data from the DRSC Integrative Ortholog Prediction Tool.** The different ortholog prediction algorithms that DIOPT compares are shown in the left column. The simple score from each algorithm predicts whether *apoc1* is orthologous (score=1) or not (score=0) to human *APOC1*. The weighted score is based on each of the algorithms prediction score that DIOPT assigns. Bottom, summary of result with ranking and scoring.

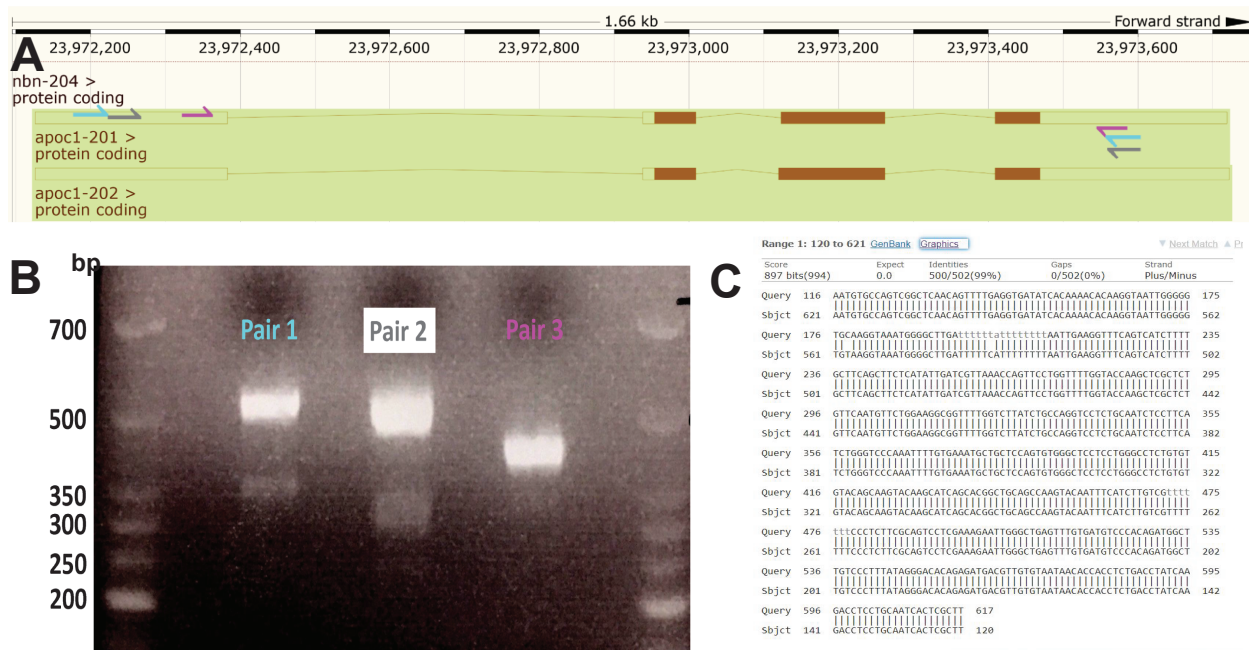

**Fig. S2.** A. PCR primers (3 pairs, indicated by different colors) used to synthesize *apoc1* cDNA from retinal mRNA after reverse transcription and the approximate location of annealing on the *apoc1* coding sequence. B. Gel electrophoresis after RT-PCR returning amplicons at expected sizes for *apoc1* cDNA. C. Sanger sequencing results of amplicon obtained from Primer Pair 2 and alignment to *apoc1* coding sequence.

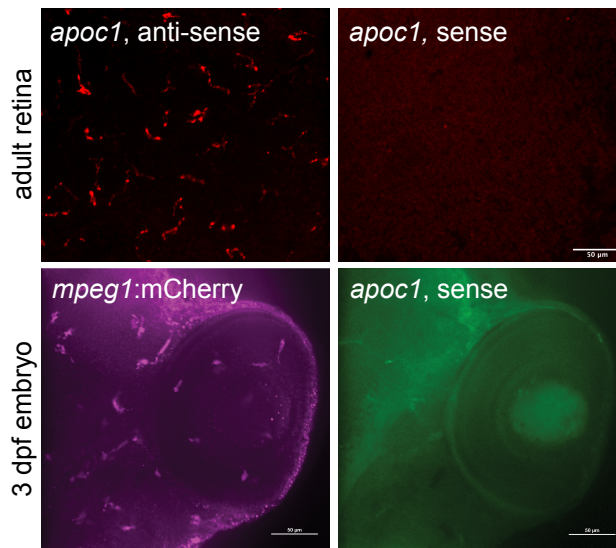

**Fig. S3.** Validation of in-house generated RNA probes to detect *apoc1* transcripts in situ. Images from adult retina (top row) and head of 3 dpf *mpeg1:mCherry* transgenic embryo (bottom row). Signal is only obtained with the anti-sense probe.

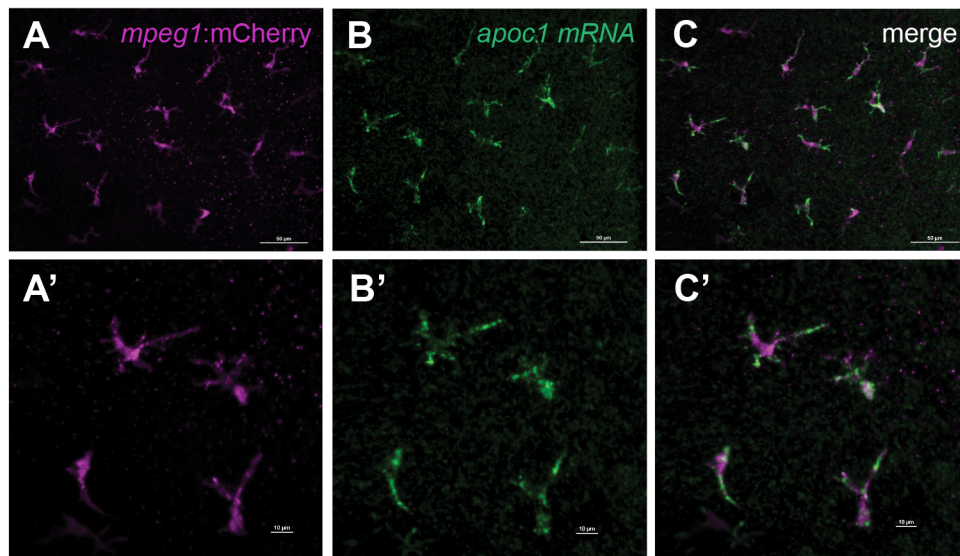

**Fig. S4.** Images from regions of flat-mounted whole adult zebrafish retinas showing expression of *mpeg1:mCherry* reporter (A, magenta) in microglia and *apoc1* transcripts detected by in-house generated RNA probes (B, green). Merged images shown in C. A', B', and C' show enlarged views of A-C.

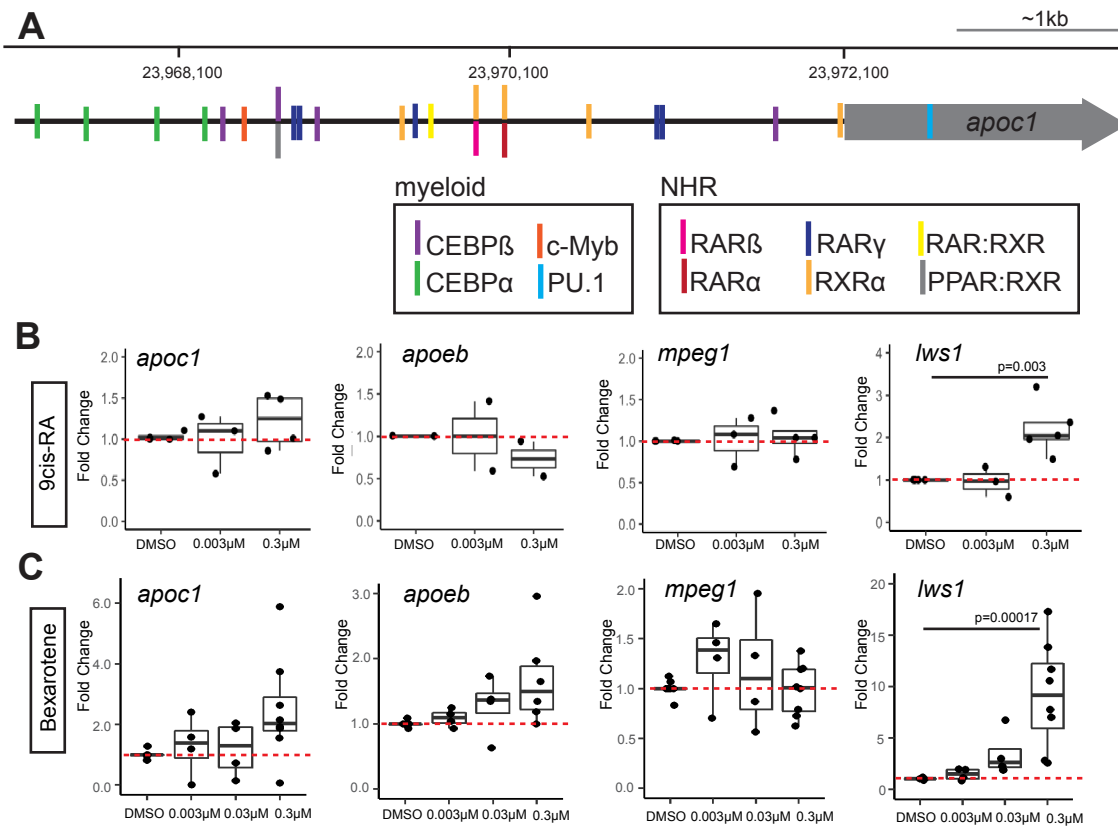

**Fig. S5.** A. Results of PROMO analysis showing returned predicted transcription factor binding sites in the zebrafish *apoc1* upstream genomic region. B. Effects of 9-cisRA on the indicated genes measured by qPCR, using RNA isolated from whole embryo heads. C. Effects of Bexarotene on the indicated genes measured by qPCR, using RNA isolated from whole embryo heads. Each dot represents the value from one sample of pooled heads (3-9 heads pooled per sample). Statistically significant differences (only found for the control gene, *lws1*) are indicated by shown p-values.



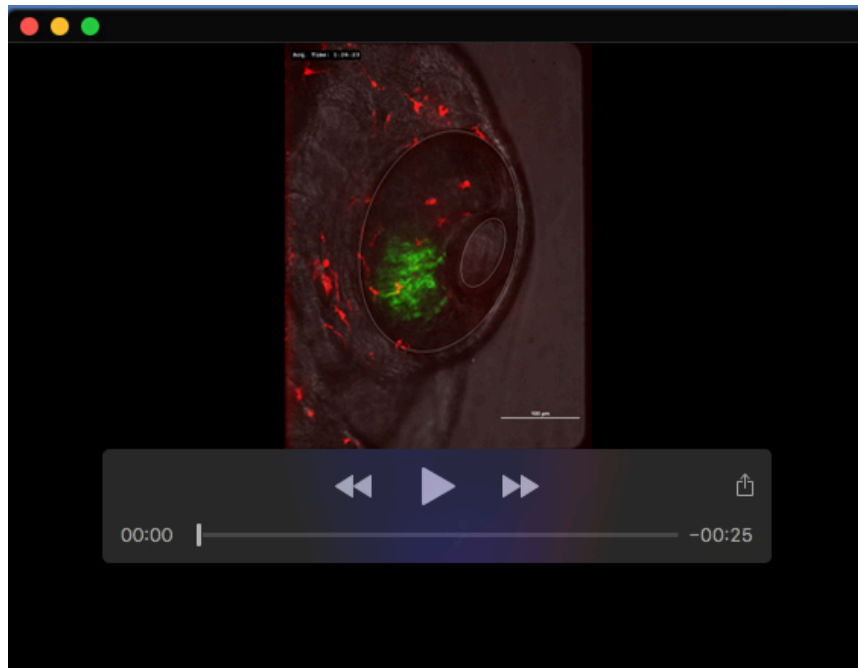

**Movie 1.** Real-time live imaging of brain and eye of *RARE:YFP; mpeg1:mCherry* double transgenic embryo at 3 dpf. Microglia (mCherry+) migrate through the active RA signaling zone (YFP+, green) but do not express the *RARE:YFP* reporter. Outlines mark the eye and lens. Imaging over a total of 8 hours, with z stacks acquired every 5 minutes. Timestamp in upper left is in hours:min:sec.
